# Supplementary material for: Chinese medicine in the treatment of non-alcoholic fatty liver disease based on network pharmacology: a review
Source: PubMed Central journal article supplement (PMC11061375; doi:10.3389/fphar.2024.1381712), 2024-04-17
Supplement: Table1.pdf [file Table1.pdf]

**Supplementary TABLE 1 | Network pharmacology analysis of TCM in the treatment of NAFLD.**

| Reference          | Formulae & Herbs       | Objects                                      | Main Compounds                                                    | Main Target            | Main Pathway                      | Signaling | Outcome                                                                                                      |
|--------------------|------------------------|----------------------------------------------|-------------------------------------------------------------------|------------------------|-----------------------------------|-----------|--------------------------------------------------------------------------------------------------------------|
| Li et al. (2021)   | Andropanthes           | Molecular docking                            | Andrographolide                                                   | IL1B, MAPK8, AKT1      | TNF, IL-17, Toll-like receptor    |           | Therapeutic effects through antioxidant, anti-inflammatory and modulation of new fatty acid synthesis        |
| Wei et al. (2022)  | Black ginseng          | C57BL/6 mice, Molecular docking              | Ginsenosides                                                      | STAT3, PIK3CA, VEGFA   | Pathways in cancer, HIF-1         |           | Black ginseng and its key components significantly improve liver histological changes in NAFLD mice          |
| Hong et al. (2019) | Grapefruit peel        | C57BL/6 mice                                 | Narirutin, Neohesperidin, Naringin                                | VEGF-C, COL4A1         | Toll-like receptor, P53, MAPK     |           | Grapefruit peel may exert therapeutic effects on NAFLD via VEGF-C and COL4A1                                 |
| Sun et al. (2022)  | Lonicera japonica flos | HepG2 Cells, Molecular docking               | Isochlorogenic acid B, Neochlorogenic acid, Quercetin-O-glucoside | CASP3, TNF, PTGS2      | PI3K-AKT-mTOR, TNF, IL6-JAK-STAT3 |           | Lonicera japonica Flos significantly down-regulates CASP3 and TNF- $\alpha$ expression in a NAFLD cell model |
| Luo et al. (2021)  | Paeoniae radix alba    | Molecular docking, Surface plasmon resonance | Catechin, Gallic acid                                             | PRKAG1, PRKAG2, PRKAG3 | Adipocytokine, Estrogen, HIF-1    |           | Paeoniae Radix Alba is able to mitigate NAFLD through multiple metabolic pathways                            |

|                     |                             |                                |                                                    |                              |                                |                                                                                                                                      |
|---------------------|-----------------------------|--------------------------------|----------------------------------------------------|------------------------------|--------------------------------|--------------------------------------------------------------------------------------------------------------------------------------|
| Gong et al. (2022)  | Eucommia ulmoides           | HepG2 cells, Molecular docking | Eucommia ulmoides leaves 50                        | ALB, AKT1, TP53              | NAFLD, Pathways in cancer, TNF | Key components of Eucommia ulmoides leaves significantly reduce lipid accumulation in the body and increase PPAR $\gamma$ expression |
| Wang et al. (2022)  | Gynostemma pentaphyllum     | Molecular docking              | Quercetin, Rhamnazin, 3-methylerythrodityol        | AKT1, GSK3B                  | PI3K-Akt                       | Gynostemma pentaphyllum inhibits insulin resistance by modulating the P13K-AKT signaling pathway                                     |
| Mao et al. (2023)   | Ganoderma lucidum           | C57BL/6 mice                   | Resinacein S                                       | NR1H4, CYP17A1, MMP1         | T-cell receptor, TNF, MAPK     | Resinacein S significantly improves lipid metabolism in hepatocytes, protects against steatosis, and attenuates liver injury         |
| Li et al. (2023)    | Schisandra chinensis        | HepG2 cells, C57BL/6J mice     | S. chinensis fruit ethanol, Lignans, schisandrol A | PIK3CA, GSK3 $\beta$ , JNK1  | Pathways in cancer, TNF, AMPK  | The key ingredient lignans modulates the insulin resistance signaling pathway, leading to therapeutic effects on NALFD               |
| Xu et al. (2021)    | Saffron                     | C57BL/6J mice                  | Crocetin                                           | AKT1, MAPK1, STAT3           | HIF-1, TNF, NF-kB              | Crocetin modulates signaling pathways such as oxidative stress and diabetes to exert therapeutic effects in NAFLD                    |
| Hong et al. (2017b) | Radix salviae miltiorrhizae | C57BL/6J mice                  | Danshensu, Salvianolic acid b, Tanshinone iia      | PPAR $\alpha$ , MMP2, CYP1A2 | None                           | Key components of Radix salviae miltiorrhizae regulate lipid metabolism in the body, thereby exerting a modulatory effect on disease |

|                     |                             |                                         |                                                 |                   |                                                     |                                                                                                                                                  |
|---------------------|-----------------------------|-----------------------------------------|-------------------------------------------------|-------------------|-----------------------------------------------------|--------------------------------------------------------------------------------------------------------------------------------------------------|
| Wu et al. (2021)    | Paederia scandens           | Ross 305 chicks                         | Quercetin, Kaempferol                           | BCL2, TP53, SPP1  | Toll-like receptor, Salmonella infection, Apoptosis | Paederia scandens significantly down-regulates serum triglyceride levels in NAFLD chickens                                                       |
| Chen et al. (2021)  | Polygoni orientalis fructus | Human hepatocytes LO <sub>2</sub> cells | Syringic acid, Gallic acid, Protocatechuic acid | PPARG, IL6, TNF   | AMPK, NF-kB                                         | Polygoni Orientalis Fructus is effective in alleviating hepatic steatosis, oxidative stress, mitochondrial dysfunction and inflammatory response |
| Sun et al. (2022)   | Artichoke                   | HepG2 cells, Molecular docking          | Cynarine                                        | TP53, ELANE, MMP9 | PI3K-Akt, MAPK                                      | Cynarine significantly reduces the fat deposition capacity of NAFLD model cells                                                                  |
| Huang et al. (2023) | Cassiae semen               | HepG2 cells, Molecular docking          | CS ethanol extract                              | PIK3CA, CASP3, A4 | MAPK                                                | Cassiae semen reduces EGFR and CASP3 expression by modulating the MAPK signaling pathway and ultimately reduces intracellular lipid accumulation |
| Wang et al. (2021a) | Blueberry                   | HepG2 cells,                            | Quercetin, Kaempferol, Catechin                 | AKT1, IL6, VEGFA  | TNF, Pathways in cancer, NF-kB                      | Blueberry leaves can exert positive effects on NAFLD by modulating relevant targets and apoptotic pathways                                       |
| Jiang et al. (2022) | Silybum marianum            | C57BL/6J mice                           | Arachidonic acid, (-)-taxifolin, Stigmasterol   | IL-6, MAPK1, AKT1 | Pathways in cancer, Hepatitis B, HIF-1              | Silybum marianum is able to down-regulate MAPK1, IL-6 and other proteins and increase AKT1 protein expression to exert therapeutic effects       |

|                     |                                                    |                                 |                                        |                                    |                                                            |                                                                                                                                               |
|---------------------|----------------------------------------------------|---------------------------------|----------------------------------------|------------------------------------|------------------------------------------------------------|-----------------------------------------------------------------------------------------------------------------------------------------------|
| Zhang et al. (2022) | Huanglian-Wuzhuyu herb pair                        | C57BL/6 mice, Molecular docking | Berberine, Epiberberine, Coptisine     | NLRP3, ASC, Caspase-1              | Metabolism, PPAR, AMPK                                     | Huanglian-Wuzhuyu herb pair inhibits NLRP3 inflammasome and reduces hepatic steatosis and inflammation                                        |
| Nie et al. (2020)   | Chaihu Shugan powder                               | Wistar rats, Molecular docking  | Naringin, Isorhamnetin, Kaempferol     | FXR, PPAR $\alpha$ , PPAR $\gamma$ | Tumours or cancers, Hepatitis B, Th17 cell differentiation | Chaihu Shugan powder was able to improve liver histopathology, liver lipids and body weight in a rat model                                    |
| Wei et al. (2021)   | Sinisan                                            | Wistar rats                     | Quercetin, Mairin, Jaranol             | STAT3, C, TNNB1, MAPK1             | Jak2/STAT3                                                 | Sinisan reduces hepatic steatosis and hepatic inflammation and inhibits hepatocyte apoptosis                                                  |
| Li et al. (2019b)   | ShengMai-Yin and Ganmaidazao decoction combination | C57BL/6J mice                   | Quercetin, Kaempferol, Ursolic acid    | INSR, PPARG, TNF                   | PI3K-Akt, AMPK, PPAR                                       | ShengMai-Yin and Ganmaidazao decoction combination is able to reduce the size of adipocytes and decrease lipid deposition in the liver        |
| He et al. (2022)    | Shenqi pill                                        | SD rats                         | Quercetin                              | PTGS2, JUN, MYC                    | IL-17, Human cytomegalovirus infection, TNF                | Shenqi Pill significantly improves hepatic inflammation, lipid metabolism and liver injury in NASH rats                                       |
| Liu et al. (2021)   | Erchen decoction                                   | C57BL/6J mice                   | Quercetin, Beta-sitosterol, Sitosterol | HMGCR, HTR2A, MMP2                 | TNF, PI3K-Akt, Toll-like receptor                          | Erchen decoction is able to reverse the levels of inflammatory factors in the body, thereby inhibiting the exacerbation of liver inflammation |

|                     |                        |                            |                                                   |                         |                                    |                                                                                                                                      |
|---------------------|------------------------|----------------------------|---------------------------------------------------|-------------------------|------------------------------------|--------------------------------------------------------------------------------------------------------------------------------------|
| Huang et al. (2020) | Erzhi pill             | Molecular docking          | Luteolin, Linarin                                 | SRC, PIK3R1, AKT1       | Pathways in cancer, PI3K-Akt, FoxO | Erzhi pill exerts preventive effects on chronic liver disease through a multi-component, multi-target, multi-pathway approach        |
| Yang et al. (2020)  | Fuzi Lizhong decoction | Wistar rats                | Codonopsine, (S)-6-Gingerol, Delcosine            | TP53, JUN, DPP4         | p53, PPARG                         | Fuzi Lizhong decoction regulates the body's immune system by modulating relevant signaling pathways, ultimately improving NAFLD      |
| Gao et al. (2022)   | Ganlu powder           | Molecular docking          | Berberine, Epiberberine, Jatrorrhizine            | AKT1, TP53, MAPK8       | TNF, HIF-1, Pathways in cancer     | Ganlu powder is able to modulate the TNF signaling pathway by affecting AKT1 to achieve therapeutic effects                          |
| Hu et al. (2020)    | Xiaochaihu decoction   | None                       | Quercetin, Kaempferol, Stigmasterol               | AKT1, IL6, JUN          | AGE-RAGE, HIF-1, IL-17             | Xiaochaihu decoction exerts positive therapeutic effects on NAFLD by regulating the body's oxidative stress, metabolism and immunity |
| Shi et al. (2022)   | San-Huang-Tang         | C57BL/6J mice, HepG2 cells | Palmidin C, Rheidin B, Sennidin C                 | CP2E1, P53, HMOX1       | INSR/IRS1/AKT/FoxO1                | San-Huang-Tang significantly ameliorates insulin resistance in NAFLD mice                                                            |
| Wu et al. (2021)    | ZeXie decoction        | SD rats                    | Alisol Monoacetate, Alisol C, Alisol B 23-Acetate | C HMGCR, SREBP-2, MAPK1 | Pathways in cancer, PPAR, AGE-RAGE | ZeXie decoction exerts therapeutic effects on NAFLD by modulating NF-κB p65, HMGCR, and MAPK1                                        |

|                       |                             |                                                  |                                                                             |                    |                                                                               |                                                                                                                                                                      |
|-----------------------|-----------------------------|--------------------------------------------------|-----------------------------------------------------------------------------|--------------------|-------------------------------------------------------------------------------|----------------------------------------------------------------------------------------------------------------------------------------------------------------------|
| Zhang et al. (2020a)  | Chaihu Lizhong Tang         | Molecular docking                                | $\alpha$ -Amyrin, 8B-Ethoxy Atractylenolide III, Beta-Sitosterol/Sitosterol | AKT1, ALB, IL6     | AGE-RAGE, IL-17                                                               | Chaihu Lizhong Tang has obvious therapeutic effects against NAFLD and is characterized by the synergistic effects of multi-component, multi-target and multi-pathway |
| Wang et al. (2020b)   | Jiangzhi decoction          | Human hepatic L02 cell line, Molecular docking   | Hyperin, Emodin, Emodinanthrone                                             | TNF, IGF1, IL1B    | Nuclear receptor transcription, Glutathione conjugation, Interleukin-4 and 13 | Jiangzhi decoction modulates key molecules associated with nuclear receptor transcription and lipid metabolism to alleviate hepatocellular steatosis                 |
| Gao et al. (2020)[87] | Qushi Huayu decoction       | None                                             | Quercetin, Luteolin, Isorhamnetin                                           | ATK1, JUN, ALB     | Pathways in cancer, PI3K-Akt, PPAR                                            | Qushi Huayu Decoction exerts hepatoprotective effects by modulating the cancer pathway, P13K-AKT signaling pathway and PPAR signaling pathway                        |
| Wu et al. (2023)      | Qutan Huoxue decoction      | SD rats, Primary hepatocytes                     | Wogonin, Kaempferol, Isorhamnetin                                           | MAPK14, AKT1, FOX  | SCOS1/NF- $\kappa$ B/TLR4                                                     | Qutan Huoxue decoction exerts hepatoprotective effects by activating SCOS1/NF- $\kappa$ B/TLR4 signaling pathway                                                     |
| Xu et al. (2022)      | Shen-Shi-Jiang-Zhuo formula | SD rats                                          | Ellagic acid, Mandenol, Mollugin                                            | PTGS2, RXRA, NCOA2 | PI3K-Akt                                                                      | Shen-Shi-Jiang-Zhuo Formula ameliorates hepatic lipid accumulation and fibrosis, and reduces collagen deposition in NAFLD rats                                       |
| Yang et al. (2022b)   | Shugan Xiaozhi decoction    | Molecular docking, Molecular dynamics simulation | Galic acid, Chlorogenic acid, Isochlorogenic acid A                         | RELA, IL-6, VEGFA  | PI3K-Akt, MAPK, Insulin resistance                                            | Shugan Xiaozhi decoction is able to modulate the active substances and key targets in multiple related pathways to exert therapeutic effects                         |

|                       |                                |                            |                                         |                     |                                                    |                                                                                                                                                                         |
|-----------------------|--------------------------------|----------------------------|-----------------------------------------|---------------------|----------------------------------------------------|-------------------------------------------------------------------------------------------------------------------------------------------------------------------------|
| Yin et al. (2022)[91] | Shuangyu Tiaozhi decoction     | Rats, HepG2 cells          | Diosgenin, Hancinol, Denudatin B        | ESR1, FASN, mTOR    | Thyroid hormone, Insulin resistance, HIF-1         | Shuangyu Tiaozhi decoction ameliorates lipid deposition, inflammation and insulin resistance and exerts anti-NAFLD effects                                              |
| Wang et al. (2021c)   | Fufang Zhenzhu Tiaozhi capsule | Minipigs                   | Quercetin, Kaempferol, Luteolin         | STAT3, A, KT1, JUN  | PI3K-AKT, HIF-1 $\alpha$                           | Fufang Zhenzhu Tiaozhi capsule can increase the phosphorylation of PI3K-AKT and decrease the expression of HIF-1 $\alpha$ , and ultimately improve the liver metabolism |
| Zhi et al. (2023)     | GanShuang granules             | SD rats, Molecular docking | Resveratrol, Naringin                   | AKT1, CASP9, TNF    | Oxidative stress, NF- $\kappa$ B, Apoptosis        | GanShuang granules ameliorate the inflammatory state and restore the abnormal lipid accumulation in the liver of NAFLD rats                                             |
| Li et al. (2018)      | Jian-Gan-Bao                   | C57BL/6J mice              | Tanshiquinone B, Miltirone, Miltirone I | IL6, TNF, SREBF1    | Inflammation, Fatty acid oxidation, TNF production | Jian-Gan-Bao has significant preventive effects on acute and chronic alcoholic liver disease and NAFLD                                                                  |
| Zhou et al. (2021)    | Jiangzhi granule               | C57BL/6 mice               | Emodin, Resveratrol, Quercetin          | TNF, IL6, CCL2      | IL-17, TNF, Toll-like receptor                     | Jiangzhi Granule lowers liver cholesterol levels and also reduces inflammatory factors in the liver                                                                     |
| Zhang et al. (2020b)  | Kangtaizhi granule             | SD rats, HepG2 cells       | Quercetin, Linoleic acid, Kaempferol    | PPARG, ADIPOQ, AKT1 | AMPK/mTOR                                          | Kangtaizhi granule ameliorates hepatic steatosis and lipid accumulation in rat and HepG2 cells by acting on the AMPK/mTOR signaling pathway                             |

|                   |                        |                                 |                                                               |                    |                                                                              |                                                                                                                          |
|-------------------|------------------------|---------------------------------|---------------------------------------------------------------|--------------------|------------------------------------------------------------------------------|--------------------------------------------------------------------------------------------------------------------------|
| Jia et al. (2022) | Mailuoning oral liquid | C57BL/6 mice, HepaRG cell line  | Neochlorogenic acid, Chlorogenic acid, Cryptochlorogenic acid | AKT1, MAPK1, MAPK3 | PGC-1 $\alpha$ -PPAR $\alpha$                                                | Mailuoning oral liquid exerts hepatoprotective effects by modulating the PGC-1 $\alpha$ -PPAR $\alpha$ signaling pathway |
| Tan et al. (2023) | Yinzhihuang granule    | C57BL/6 mice, Molecular docking | Apigenin 7-glucoside, Apigenin 7-O-glucuronide, Baicalein     | AKT1, MMP9, EGFR   | Sphingolipid metabolism, Glycerophospholipid metabolism, Caffeine metabolism | Yinzhihuang granule significantly improves hepatic lipid metabolism and enhances intestinal barrier function             |
